# Supplementary material for: Rod–coil block copolymer aggregates via polymerization-induced self-assembly
Source: Royal Society of Chemistry journal article supplement (doi:10.1039/d0sm00244e), 2020-01-01
Supplement: d0sm00244e1.pdf [file d0sm00244e1.pdf]

## Supplemental Information for

# Rod-Coil Block Copolymer Aggregates via Polymerization-Induced Self-Assembly

*Yisheng Lv, Liquan Wang\*, Fan Liu, Weisheng Feng, Jie Wei, and Shaoliang Lin\**

Shanghai Key Laboratory of Advanced Polymeric Materials, Key Laboratory for Ultrafine Materials of Ministry of Education, School of Materials Science and Engineering, East China University of Science and Technology, Shanghai 200237, China.

---

Corresponding Authors

E-mail: [lq\\_wang@ecust.edu.cn](mailto:lq_wang@ecust.edu.cn) (L. W.); [slin@ecust.edu.cn](mailto:slin@ecust.edu.cn) (S. L.)

## CONTENT

|                                                                    |    |
|--------------------------------------------------------------------|----|
| 1. The persistence length of rod blocks.....                       | S3 |
| 2. Relationship between $k[\mathbf{C}^*]$ and $[\mathbf{M}]$ ..... | S5 |
| 3. Relationship between $k$ and $[\mathbf{C}^*]$ .....             | S6 |

## 1. The persistence length of rod blocks

The persistence length of rod block was calculated to evaluate the rigidity of rod blocks. The persistence length  $l_p$  is given by

$$\langle \mathbf{u}_i \cdot \mathbf{u}_j \rangle = \exp(-s / l_p) \quad (\text{S-1})$$

Here,  $\mathbf{u}_i$  and  $\mathbf{u}_j$  are the unit vectors of  $i$ th and  $j$ th bond, respectively.  $s=|i-j|l_b$  is the contour distance between  $i$ th and  $j$ th bond, where  $l_b$  is the bond length. Here,  $l_b$  nearly equals to the equilibrium bond distance (*ca.*  $0.8 r_c$ ). In the simulation, we subjected a single rigid chain ( $k_\theta = 10$ ) with 25 DPD beads in a simulation box of  $L = 40r_c$  with periodic boundary conditions and full of solvent beads. The system was simulated with all  $a_{ij}$  equal to 25 for  $2.0 \times 10^6$  DPD steps.

Figure S1 shows the plot of  $\langle \mathbf{u}_i \cdot \mathbf{u}_j \rangle$  as a function of  $s$ . By fitting the data with the Eq. S-1, we obtained the persistence length. The persistence length of rod blocks is *ca.*  $20.7 r_c$ . Considering that the maximum targeted DP of rod blocks studied in this work is 10, the maximum contour distance  $s$  is *ca.*  $7.2 r_c$ . The persistence length of rod blocks is significantly larger than the contour distance, indicating the sufficient rigidity of the rod blocks.

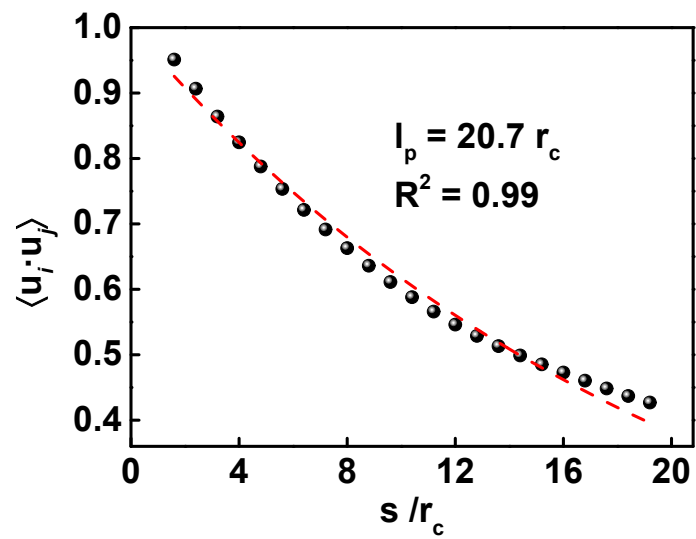

**Figure S1.** The plot of  $\langle \mathbf{u}_i \cdot \mathbf{u}_j \rangle$  as a function of  $s$ . The red dashed line is the fitting line.

## 2. Relationship between $k[C^*]$ and $[M]$

We calculated pseudo-first-order reaction rate constant  $k[C^*]$  at different monomer concentrations  $[M]$  to figure out whether or not the  $k[C^*]$  depends upon the concentration of monomers in the PISA. The results are shown in Figure S2. As shown,  $k[C^*]$  depends significantly on  $[M]$ . However,  $k[C^*]$  is unchanged at lower and higher  $[M]$ , which correspond to the two linear regions in Figure 2. The lower and higher  $[M]$  correspond to the aggregate-dominated and free-chain dominated states, respectively.  $k[C^*]$  decreases with the decrease of  $[M]$  in the range from  $[M]=1.5\%$  to  $[M]=3.6\%$  because of the heterogeneous growths of the free chain and the aggregated chain. As such,  $k[C^*]$  is mainly governed by the state of copolymer chains (free chains and aggregated chains) rather than the concentration of monomers during the PISA.

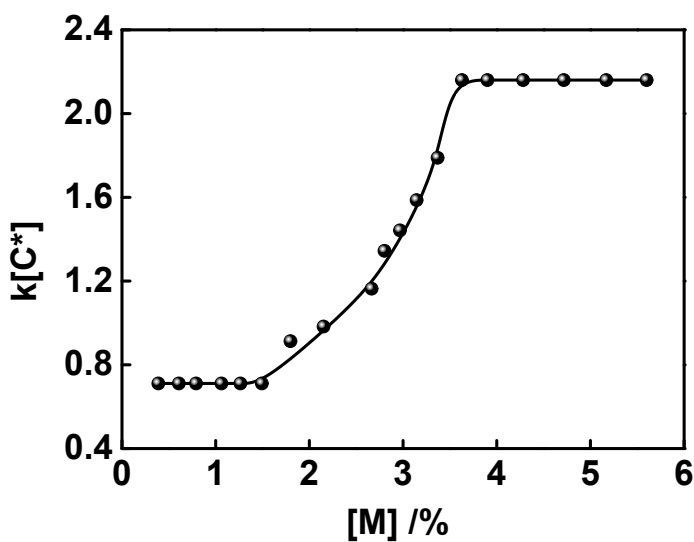

**Figure S2.** Plots of  $k[C^*]$  as a function of monomer concentrations  $[M]$  during the PISA. The targeted DP of the rod blocks, the macromolecular initiator, and the copolymer concentrations are 7,  $C_3^*$ , and 8%, respectively.

### 3. Relationship between $k$ and $[C^*]$

Figure S3 shows the rate coefficient  $k$  against the initiator concentrations  $[C^*]$ . The  $k$  values for the first linear (free-chain dominated) regions and the second linear (aggregated dominated) region are respectively given in the Figure. The values of  $k$  in the first linear region are almost unchanged with the increasing of  $[C^*]$ , denoting that  $k$  is independent of  $[C^*]$ . This fact indicates that the polymerization in the first linear (free-chain dominated) region is similar to the free radical polymerization. In the second linear region,  $k$  increases with the increase of  $[C^*]$ . In this region, the growth of the chains is limited by the aggregate. At higher  $[C^*]$  (hydrophobic chain), smaller aggregates are formed, and therefore, the chains are less confined and can grow more rapidly.

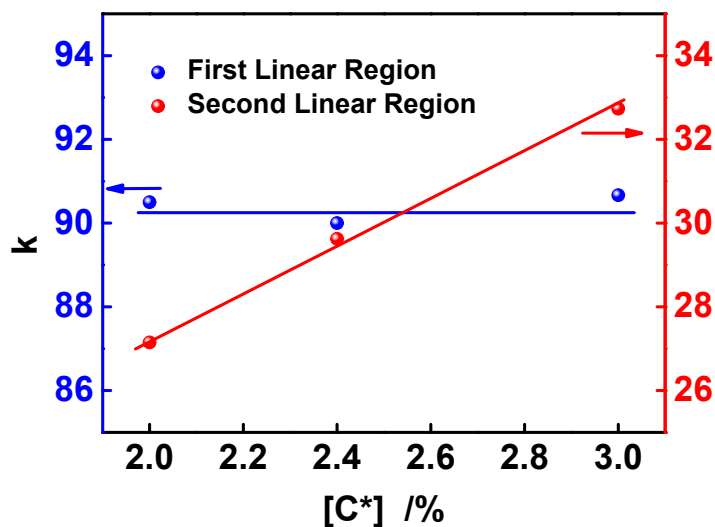

**Figure S3.** Plots of the rate coefficient  $k$  against initiator concentrations  $[C^*]$  in the first and second linear regions. The macromolecular initiator and the copolymer concentrations are  $C_3^*$  and 8%, respectively.
